# Discovery of 6.4 keV line and soft X-ray emissions from G323.7–1.0 with Suzaku

Shigetaka SAJI,<sup>1,2,\*</sup> Hironori MATSUMOTO,<sup>2</sup> Masayoshi NOBUKAWA,<sup>3</sup>  
Kumiko K. NOBUKAWA,<sup>4</sup> Hideki UCHIYAMA,<sup>5</sup> Shigeo YAMAUCHI,<sup>4</sup>  
and Katsuji KOYAMA<sup>6</sup>

<sup>1</sup>Division of Particle and Astrophysical Science, Graduate School of Science, Nagoya University, Furo-cho, Chikusa-ku, Nagoya, Aichi 464-8602, Japan

<sup>2</sup>Department of Earth and Space Science, Graduate School of Science, Osaka University, 1-1 Machikaneyama-cho, Toyonaka, Osaka 560-0043, Japan

<sup>3</sup>Faculty of Education, Nara University of Education, Takabatake-cho, Nara, Nara 630-8528, Japan

<sup>4</sup>Department of Physics, Faculty of Science, Nara Women's University, Kitaoyanishi-machi, Nara, Nara 630-8506, Japan

<sup>5</sup>Faculty of Education, Shizuoka University, 836 Ohya, Suruga-ku, Shizuoka, Shizuoka 422-8529, Japan

<sup>6</sup>Department of Physics, Graduate School of Science, Kyoto University, Kitashirakawa-oiwake-cho, Sakyo-ku, Kyoto, Kyoto 606-8502, Japan

\*E-mail: [s\\_saji@u.phys.nagoya-u.ac.jp](mailto:s_saji@u.phys.nagoya-u.ac.jp)

Received 2017 November 29; Accepted 2017 December 21

## Abstract

In this paper, the Suzaku X-ray data of the Galactic supernova remnant (SNR) candidate G323.7–1.0 are analyzed to search for X-ray emissions. Spatially extended enhancements in the 6.4 keV line and in soft X-rays are found inside or on the radio shell. The soft X-ray enhancement would be the hottest part of the shell-like X-ray emission along the radio shell. The 6.4 keV line enhancement is detected at a significance level of  $4.1\sigma$ . The lower limit of the equivalent width (EW) is 1.2 keV. The energy centroid of the 6.4 keV line is  $6.40 \pm 0.04$  keV, indicating that the iron is less ionized than the Ne-like state. If the 6.4 keV line originates from ionizing non-equilibrium thermal plasma, presence of iron-rich ejecta in a low-ionization state is required, which is disfavored by the relatively old age of the SNR. The 6.4 keV line enhancement would be due to K-shell ionization of iron atoms in a dense interstellar medium by high-energy particles. Since there is no irradiating X-ray source, the origin of the 6.4 keV line enhancement is not likely the photoionization. The large EW can only be explained by K-shell ionization due to cosmic-ray protons with an energy of  $\sim 10$  MeV, which might be generated by the shock acceleration in G323.7–1.0.

**Key words:** cosmic rays — ISM: individual (G323.7–1.0) — ISM: supernova remnants — X-rays: ISM

## 1 Introduction

Many supernova remnants (SNRs) show iron  $K\alpha$  emission lines. Since the energy centroids of the lines are lower than

6.7 keV in general, the iron is less ionized than the helium-like state (Yamaguchi et al. 2014). These line emissions are thought to originate from thermal processes in the ionizing plasma. Sato et al. (2016) reported a peculiar 6.4 keV

line from Kes 79. The spatial distribution of the line emission is correlated with a molecular cloud rather than the thermal X-ray radiation. Thus, the 6.4 keV line emission from Kes 79 is unlikely to originate from thermal processes. Sato et al. (2014) also discovered a hint of the 6.4 keV emission line from 3C 391, which can be associated with molecular clouds. Such a 6.4 keV line was also reported from five Galactic SNRs even though the electron temperature of their thermal plasma is lower than  $\sim 1$  keV (Nobukawa et al. 2018). Since almost no iron K-shell lines are emitted from such low-temperature plasma, the 6.4 keV line emission is thought to be generated by non-thermal processes such as interactions between low-energy cosmic-ray particles and adjacent cold gases, or photoionization. Because of the large equivalent width (EW) of  $\gtrsim 400$  eV and the absence of X-ray irradiating sources, the authors claimed that low-energy cosmic-ray protons with  $\sim$ MeV energy are the most plausible origin of the 6.4 keV line.

G323.7–1.0 is an SNR candidate discovered in the radio band by the Molonglo Galactic Plane Survey (Green et al. 2014). The radio image shows an extremely faint oval shell with a size of  $\sim 51' \times 38'$ . Because of its large and faint radio shell, G323.7–1.0 would be an old SNR. GeV and TeV gamma-ray emissions coincident with G323.7–1.0 have been discovered by Fermi and High Energy Stereoscopic System (H.E.S.S.; Pühlhofer et al. 2015; Araya 2017), respectively. The distance to the gamma-ray source was estimated to be  $\sim 5$  kpc (Araya 2017). No significant X-rays have been detected from G323.7–1.0 so far. We, therefore, searched for X-ray emission, thermal and/or non-thermal, from G323.7–1.0 with Suzaku (Mitsuda et al. 2007). Then, we discovered spatially extended 6.4 keV line emission. Although there is soft thermal emission which is not associated with the 6.4 keV line, no plasma hot enough to emit the Fe K lines is found from any region. Thus, the origin of the 6.4 keV line is due to non-thermal processes. This paper discusses the details of the 6.4 keV line emission and its origin. In this paper, the uncertainties are shown at the 90% confidence level, while the errors on the data points of spectra are given at the  $1\sigma$  level.

## 2 Observation and data reduction

Suzaku observed four regions of G323.7–1.0. Figure 1 shows the fields of view of the X-ray Imaging Spectrometer (XIS) on the 843 MHz radio image of G323.7–1.0. The Suzaku observations caught the eastern part of the radio shell. Suzaku did not observe the brightness peaks of the GeV and TeV gamma-ray emissions as shown with the white cross point and the contours in figure 1, respectively. The details of the observations are summarized in table 1.

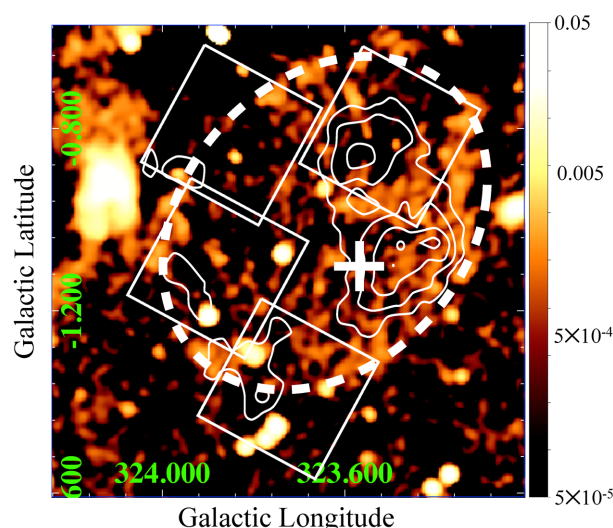

**Fig. 1.** Suzaku XIS fields of view (white solid boxes) of the observations for G323.7–1.0 on the 843 MHz radio map taken from SkyView (McGlynn et al. 1998).<sup>1</sup> The white dashed ellipse indicates the approximate shape of the radio shell. The contours show the surface brightness map of  $>1$  TeV gamma-rays (Puehlhofer et al. 2015). The cross point shows the brightness peak position of the GeV gamma-ray emission (Araya 2017). (Color online)

**Table 1.** Summary of the Suzaku observations for G323.7–1.0.

| Obs. ID   | Start time (UTC)     | Exposure* (ks) | Pointing direction ( $l, b$ ) |
|-----------|----------------------|----------------|-------------------------------|
| 508013010 | 2013-Sep-08 10:25:42 | 36.9           | (323:8857, $-1^{\circ}1033$ ) |
| 508014010 | 2013-Sep-09 00:31:34 | 38.9           | (323:5092, $-0^{\circ}8166$ ) |
| 508015010 | 2013-Sep-09 16:05:38 | 38.8           | (323:7331, $-1^{\circ}3685$ ) |
| 508016010 | 2013-Sep-10 04:19:22 | 42.2           | (323:8535, $-0^{\circ}8132$ ) |

\*Effective exposure of the screened data.

The XIS consists of four sets of CCD cameras (XIS0–3; Koyama et al. 2007a). Each CCD chip is placed on the focal plane of the X-Ray Telescope (XRT; Serlemitsos et al. 2007). XIS0, 2, and 3 employ front-illuminated (FI) CCDs, while XIS1 has a back-illuminated (BI) CCD. The CCD has 1024 by 1024 pixels, corresponding to  $17'8 \times 17'8$ . Since XIS2 suffered serious damage, it has not been usable since 2006 November 9. In the observations of table 1, the XIS was operated in the normal clocking mode with spaced-row charge injection (Bautz et al. 2007; Uchiyama et al. 2009).

We analyzed the archival data with the processing version of 3.0.22.43, using HEASoft version 6.21 and the calibration database (CALDB) released on 2016 June 7. The XIS pulse-height data for each X-ray event were converted to the pulse invariant (PI) channel using the software xispi and CALDB. The data taken at the South Atlantic Anomaly and low elevation angles of  $< 5^{\circ}$  from the night-earth rim and of  $< 20^{\circ}$  from the day-earth rim were excluded. The ancillary response files and the redistribution matrix files

<sup>1</sup> (<https://skyview.gsfc.nasa.gov/>).

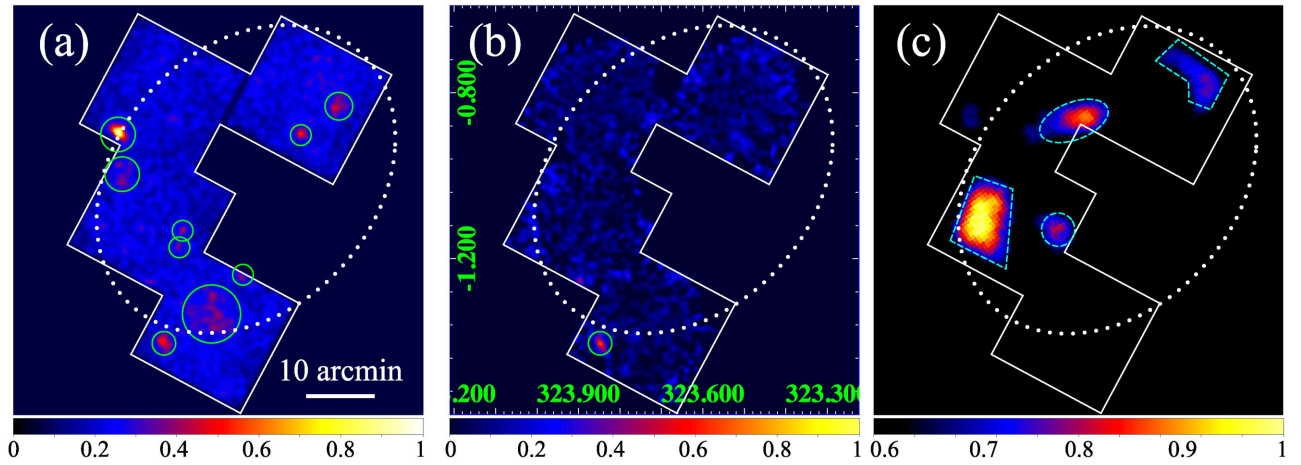

**Fig. 2.** XIS images of G323.7–1.0 in the (a) 0.5–3 keV, (b) 5–8 keV, and (c) 6.3–6.5 keV bands. The NXBs are subtracted and then the images are corrected for the vignetting effect. The images (a) and (b) are binned with  $8 \times 8$  pixels and then smoothed with a Gaussian function of  $\sigma = 5$  bins. The image (c) is binned with  $32 \times 32$  pixels and then smoothed with a Gaussian function of  $\sigma = 10$  bins. The axes of the Galactic longitude and latitude are plotted on image (b). The largest dotted ellipse in each panel indicates the approximate shape of the radio shell (see figure 1). (Color online)

were produced using the *xissimarfgen* and *xismfgen* packages of HEASoft, respectively.

### 3 Analysis and results

#### 3.1 Image

In order to search for X-ray sources in the G323.7–1.0 field, XIS images in the soft (0.5–3 keV), hard (5–8 keV), and 6.3–6.5 keV bands were made. XIS 1 (BI-CCD) data were not used to make the images above 5 keV, since the signal-to-noise ratio in the hard band is worse than that of the FI-CCDs. The corners of the CCD chips illuminated by the  $^{55}\text{Fe}$  calibration sources were excluded from the images above 5 keV. The non-X-ray backgrounds (NXBs) were estimated from the data within  $\pm 300$  d of the observation using *xisnxbgen* (Tawa et al. 2008), and were subtracted from the images. After the NXB subtraction, each image was divided by an exposure map simulated using the XRT+XIS simulator *xissim* (Ishisaki et al. 2007) for vignetting corrections.

Three panels in figure 2 show the images thus obtained in the soft, hard, and 6.3–6.5 keV bands. The soft- and hard-band images are binned with  $8 \times 8$  pixels and then smoothed with a Gaussian function of  $\sigma = 5$  bins. The 6.3–6.5 keV-band image is binned with  $32 \times 32$  pixels and smoothed with a Gaussian function of  $\sigma = 10$  bins.

In the soft-band image, there are several point-like sources marked with solid small circles, while a diffuse structure, indicated by the largest solid circle with a diameter of  $8\frac{1}{4}$ , is found in the southern field. This diffuse structure is called “the soft source” hereafter. On the other hand, there is no prominent structure in the hard band

except for one point source that is also seen in the soft band. In the 6.3–6.5 keV band, some structures are seen as marked with dashed curves. Because of their angular sizes of  $\gtrsim 5'$ , which is larger than the half-power diameter of XRT ( $\sim 2'$ ), they should not be point sources, but diffuse sources. These sources are hereafter called “the 6.4 keV clumps.”

#### 3.2 Spectrum

##### 3.2.1 The 6.4 keV clumps

In order to investigate the 6.4 keV clumps, the “enhance region” was defined as illustrated with dashed curves in figure 2c. The whole field excluding the soft source, the point sources, and the enhance region was defined as the reference region. XIS 0 and 3 spectra were extracted from the enhance and reference regions. Although the enhance region consists of four parts, the data extracted from all areas were added to improve the statistics. The NXBs were estimated using the data within  $\pm 300$  d of the observation, and were subtracted from the enhance and reference spectra.

Since G323.7–1.0 is located on the Galactic plane ( $b = -1^\circ 0$ ), there should be emission lines of the Galactic Ridge X-ray emission (GRXE). The GRXE exhibits lines of neutral iron (Fe I)  $K\alpha$ , helium-like iron (Fe XXV)  $K\alpha$ , hydrogen-like iron (Fe XXVI)  $K\alpha$ , and Fe I  $K\beta$  at 6.40 keV, 6.68 keV, 6.97 keV, and 7.06 keV, respectively (e.g., Yamauchi et al. 2016). Thus, we fitted the 5–8 keV band spectra with a model consisting of a power law and four Gaussian functions. The energy centroids of the Gaussian functions were fixed to be 6.40 keV, 6.68 keV, 6.97 keV, and 7.06 keV. The intensity of the Fe I  $K\beta$  line was set to 0.125 times that of

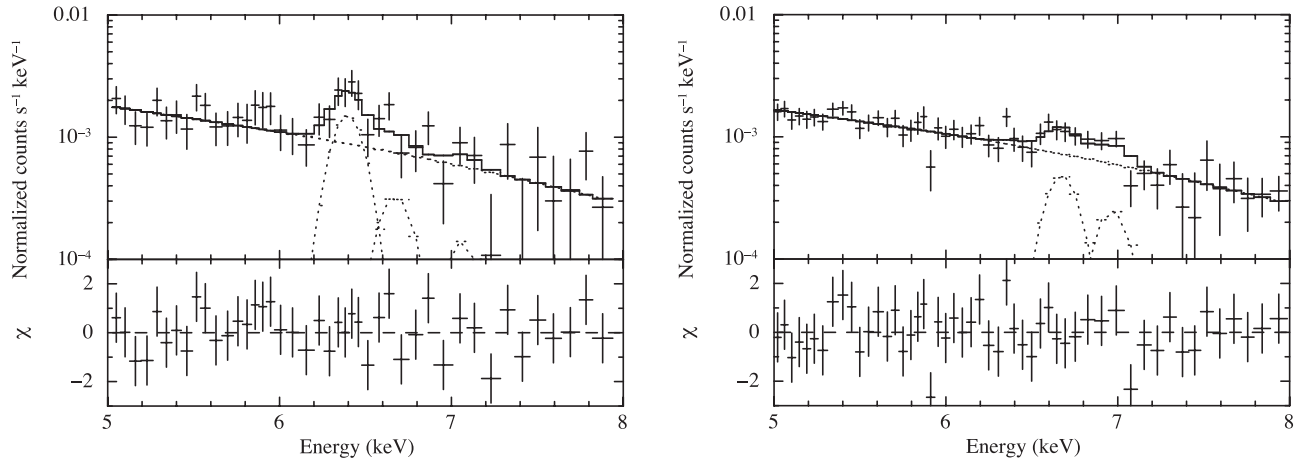

**Fig. 3.** Top panels: XIS0 + 3 spectra extracted from the enhance region (left) and the reference region (right) fitted with the model consisting of a power law and four Gaussian functions. The best-fit models are plotted with the solid lines, while each component is plotted with a dotted line. The vertical axes are normalized by the ratio of the area including the vignetting correction. Bottom panels: Residuals between the data and the best-fit models.

**Table 2.** Best-fit parameters of the model fit for the spectra of the enhance and reference regions.

| Parameter         |                               | Best-fit values                 |                                 |
|-------------------|-------------------------------|---------------------------------|---------------------------------|
|                   |                               | Enhance region                  | Reference region                |
| Power law         | Photon index                  | $2.2^{+1.0}_{-0.9}$             | $2.0 \pm 0.5$                   |
|                   | intensity*                    | $(3.3 \pm 0.5) \times 10^{-15}$ | $(3.2 \pm 0.3) \times 10^{-15}$ |
| Line intensities† | Fe I K $\alpha$ (6.40 keV)    | $4.1 \pm 1.4$                   | $<0.8$                          |
|                   | Fe XXV K $\alpha$ (6.68 keV)  | $<2.3$                          | $1.5 \pm 0.6$                   |
|                   | Fe XXVI K $\alpha$ (6.97 keV) | $<0.9$                          | $0.9 \pm 0.7$                   |

\*Observed intensity in the 5–8 keV band in units of  $\text{erg cm}^{-2} \text{s}^{-1} \text{arcmin}^{-2}$ .

†Photon intensities in units of  $10^{-8} \text{photons cm}^{-2} \text{s}^{-1} \text{arcmin}^{-2}$ .

the Fe I K $\alpha$  line (Kaastra & Mewe 1993), while those of the other lines were free parameters. The width of the Gaussian functions were fixed to be zero, except for the Fe XXV K $\alpha$  line. Since the Fe XXV K $\alpha$  line is a blend of the resonance, inter-combination, and forbidden lines, the line width was fixed to be 23 eV based on Koyama et al. (2007b). Both the photon index and the normalization of the power-law function were allowed to vary.

Figure 3 shows the spectra extracted from the enhance region and the reference region with the best-fit models. Both the model fits are statistically acceptable with  $\chi^2_{\text{red}} = 0.84$  (38 d.o.f.) for the enhance region and  $\chi^2_{\text{red}} = 0.88$  (46 d.o.f.) for the reference region. The best-fit parameters are summarized in table 2. The 6.4 keV line intensity of the enhance region is significantly higher than that of the reference region. The significance level of the excess is  $4.1 \sigma$ . On the other hand, the other parameters are consistent between the two regions.

Next, we estimated the line intensities of the GRXE at the position of G323.7–1.0, ( $l, b$ ) = (323°7, –1°0). Using

the longitude profile of Uchiyama et al. (2013) and the latitude profile of Yamauchi et al. (2016), the GRXE line intensities are calculated to be  $3.1 \times 10^{-9}$  (Fe I K $\alpha$ ),  $1.5 \times 10^{-8}$  (Fe XXV K $\alpha$ ), and  $1.6 \times 10^{-9}$  (Fe XXVI K $\alpha$ ) photons  $\text{cm}^{-2} \text{s}^{-1} \text{arcmin}^{-2}$ . Figure 4 shows a comparison of the line intensities between the enhance region, the reference region, and the GRXE model. The intensity of the 6.4 keV line of the enhance region is significantly higher than the Fe I K $\alpha$  line of the GRXE, while that of the reference region is consistent with the GRXE. The other two lines are almost consistent with the GRXE model, although the Fe XXVI K $\alpha$  intensity of the reference region is slightly higher than the model. Thus the 6.4 keV line enhancement cannot be explained by the GRXE.

Then, we calculated the EW of the 6.4 keV line enhancement. To estimate the enhanced component, the spectrum of the reference region was subtracted from that of the enhance region after correcting the difference of the area taking account of the vignetting. Figure 5 shows the spectrum of the enhance region after the subtraction. The

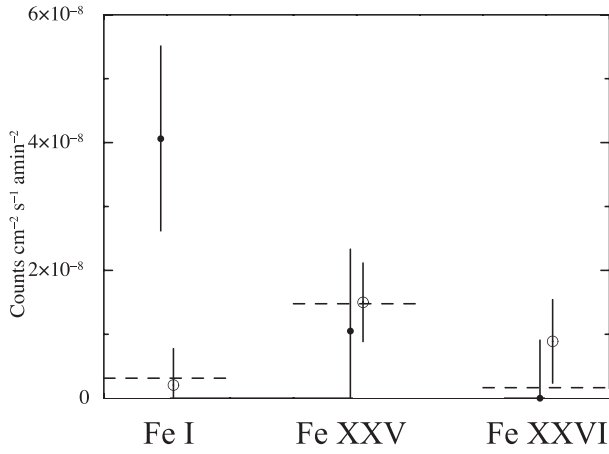

**Fig. 4.** Intensities of the Fe I (left), Fe XXV (center), and Fe XXVI (right)  $K\alpha$  lines of the enhance region and the reference region, compared with that of the GRXE. The filled and open circles indicate the line intensity estimated from the spectral fitting for the enhance region and the reference region, respectively. The dashed horizontal lines indicate the line intensities of the GRXE calculated based on Uchiyama et al. (2013) and Yamauchi et al. (2016).

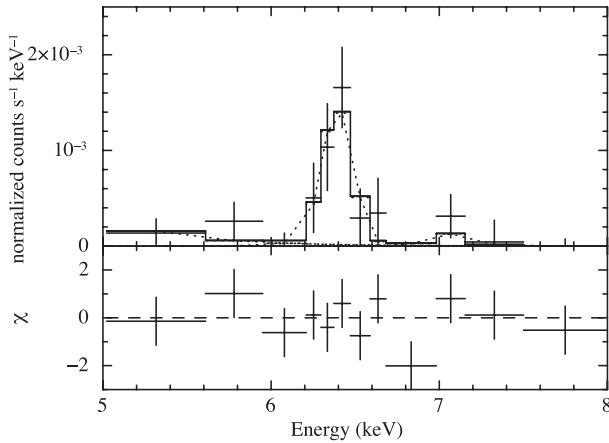

**Fig. 5.** Top panel: 5–8 keV spectrum of the enhance region fitted with the model consisting of a power law and two Gaussian functions. The spectrum of the reference region is subtracted after the area correction. The best-fit model is shown with the solid line, while each component is plotted with the dotted line. Bottom panel: Residuals between the data and the best-fit model.

spectrum was fitted with a model consisting of a power law and two Gaussian functions. The energy centroids of the Gaussian functions were fixed to be 6.40 keV and 7.06 keV, assuming the Fe I  $K\alpha$  and Fe I  $K\beta$  lines, respectively. The intensity of the Fe I  $K\beta$  line was set to 0.125 times that of the Fe I  $K\alpha$  line. The width of each Gaussian function was fixed to be zero. Both the photon index and the normalization of the power-law component were free parameters. The flux of the power-law component is consistent with zero. The lower limit of the EW of the 6.4 keV line is 2.3 keV with a confidence level of 90%. The continuum level and

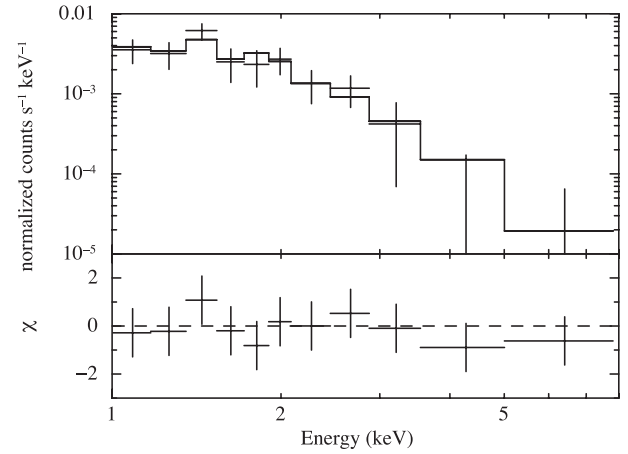

**Fig. 6.** Top panel: Background subtracted spectrum of the soft source in the 1–8 keV band fitted with the absorbed thin-thermal plasma model. The solid line shows the best-fit model. Bottom panel: Residuals between the data and the best-fit model.

hence the EW are sensitive to the vignetting correction. The lower limit of the EW of the 6.4 keV line is 1.2 keV when the uncertainty of the vignetting correction is assumed to be 5% according to the Suzaku technical description.<sup>2</sup> When the energy centroid of the Gaussian function for the 6.4 keV line is allowed to vary, it becomes  $6.40 \pm 0.04$  keV. The energy centroid is consistent with that of the Fe I  $K\alpha$  line.

### 3.2.2 The soft source

In order to investigate the soft source, we extracted an XIS 0 + 3 spectrum from the largest solid circle in figure 2a. The spectrum of the reference region was used as the background. Figure 6 shows the background-subtracted spectrum.

Although the spectrum has poor statistics, a hint of an emission line can be seen at  $\sim 1.4$  keV. We then tried fitting the spectrum with an optically thin thermal plasma model (APEC) suffering from an interstellar absorption (phabs), fixing the metal abundance at a solar value (Lodders 2003). The model represents the spectrum well, with  $\chi^2_{\text{red}} = 0.44$  (8 d.o.f.). We obtained a plasma temperature of  $kT = 1.1^{+0.5}_{-0.3}$  keV and an absorption column density of  $N_{\text{H}} = (1.8 \pm 0.6) \times 10^{22} \text{ cm}^{-2}$ , as well as a normalization of  $2.8^{+1.8}_{-1.1} \times 10^{-4}$ . The normalization is the volume emission measure represented by  $10^{-14} n_e n_{\text{H}} V / 4\pi d^2$ , where  $n_e$ ,  $n_{\text{H}}$ ,  $V$ , and  $d$  are the electron density, the hydrogen density, the plasma volume, and the distance from the solar system, respectively. The observed 1–8 keV flux is estimated to be  $8.4 \times 10^{-14} \text{ erg s}^{-1} \text{ cm}^{-2}$ .

<sup>2</sup> ([https://heasarc.gsfc.nasa.gov/docs/suzaku/prop\\_tools/suzaku\\_td](https://heasarc.gsfc.nasa.gov/docs/suzaku/prop_tools/suzaku_td)).



## 4 Discussion

### 4.1 The soft source

We constrained the interstellar absorption toward the soft source of  $N_{\text{H}} = (1.8 \pm 0.6) \times 10^{22} \text{ cm}^{-2}$ . Assuming an averaged number density of  $1 \text{ H cm}^{-3}$ , the absorption column density corresponds to a distance of  $6 \pm 2 \text{ kpc}$ , which is consistent with the distance  $d = 5 \text{ kpc}$  of the gamma-ray source coincident with G323.7–1.0 (Araya 2017). Therefore, the soft source possibly belongs to G323.7–1.0, and is a thermal plasma generated by the shock heating. The source radius is calculated to be  $6 (d/5 \text{ kpc}) \text{ pc}$  based on the angular radius of  $\sim 4.2$ . Using the plasma temperature and the volume emission measure (see sub-subsection 3.2.2), the density and the total mass are calculated to be  $0.06 \text{ cm}^{-3}$  and  $1.9 M_{\odot}$ , respectively. Here, the plasma volume is estimated assuming a sphere of radius  $6 \text{ pc}$ .

The soft source is located near the southeastern shell of G323.7–1.0 (Green et al. 2014; figure 2a). The size of the soft source is  $\sim 8.4$ , which is far smaller than the entire size of the radio shell of G323.7–1.0 ( $\sim 51' \times 38'$ ; Green et al. 2014). If G323.7–1.0 is an old SNR and the age  $t$  is larger than  $10000 \text{ yr}$ , the plasma temperature is roughly estimated to be  $0.3 (t/10^4 \text{ yr})^{-6/5} \text{ keV}$  using the Sedov solution assuming an explosion energy of  $1 \times 10^{51} \text{ erg}$  and the number density of interstellar matter of  $1 \text{ H cm}^{-3}$ . Soft X-rays from such low-temperature plasma are difficult to detect because of the interstellar absorption ( $N_{\text{H}} \sim 2 \times 10^{22} \text{ cm}^{-2}$ ). Shock-heated plasma would make a shell-like soft X-ray emission along the radio shell. The soft source would be the hottest part of the shell emission, and the other regions would be unseen due to the large interstellar absorption.

### 4.2 The 6.4 keV clumps

Thermal plasma in a non-equilibrium ionizing (NEI) state can emit the iron K-shell line at  $\sim 6.4 \text{ keV}$ . When we assume the solar abundance of Lodders (2003) and the electron temperature of  $< 5 \text{ keV}$ , the EW of the iron  $K\alpha$  line from the NEI plasma is calculated to be smaller than  $\sim 300 \text{ eV}$  using the NEI code in XSPEC (Arnaud 1996). An iron abundance higher than  $\sim 4$  solar is required to explain the observed EW. Such a high abundance can only be realized by iron-rich ejecta. The upper limit of the observed line centroid is  $6.44 \text{ keV}$ , corresponding to an ionization degree of the Ne-like state (Beiersdorfer et al. 1993; Palmeri et al. 2003; Mendoza et al. 2004). If the  $6.4 \text{ keV}$  line comes from the NEI plasma, the ionization timescale is estimated to be  $t \lesssim 300 (n_e/1 \text{ cm}^{-3})^{-1} \text{ yr}$  using the NEI code. Here,  $n_e$  is the electron number density in the NEI plasma. The ejecta in G323.7–1.0 cannot be in such a

low-ionization state since G323.7–1.0 has a large and extremely faint radio shell, and hence would not be a young SNR. Indeed, Yamaguchi et al. (2014) reported that only young SNRs exhibit such a low-ionization state using the Suzaku archive data of many SNRs. Also, the oldest SNR which shows the energy centroid of  $< 6.44 \text{ keV}$  is RCW 86, the remnant of SN 185 (Williams et al. 2011). Thus, the thermal plasma is unlikely as the origin of the observed  $6.4 \text{ keV}$  line.

Then, the  $6.4 \text{ keV}$  line emission is explained by non-thermal processes such as K-shell ionization by photons, non-thermal electrons, or protons with energy above the Fe K-edge ( $7.1 \text{ keV}$ ). In the following, we discuss which particle is the dominant source for the observed  $6.4 \text{ keV}$  line.

In the case of photoionization, a bright X-ray source is required in the vicinity of G323.7–1.0. Cir X-1, which is an X-ray binary hosting a neutron star, is located  $\sim 2^\circ$  away from G323.7–1.0. The distance from the solar system is  $4.1 \text{ kpc}$  (Iaria et al. 2005). Thus, the minimum distance between G323.7–1.0 and Cir X-1 is  $4.1 \sin(2^\circ) \text{ kpc} = 140 \text{ pc}$ . Since the angular size of the largest  $6.4 \text{ keV}$  clump is  $\sim 8'$ , the actual size of the clump is  $\sim 10 \text{ pc}$  assuming that the distance from the solar system to G323.7–1.0 is the same as that to Cir X-1,  $4.1 \text{ kpc}$ . Then, the hydrogen number density of the clump is estimated to be  $\sim 600 \text{ cm}^{-3}$  based on an empirical relation between the density and size of  $n_{\text{H}} = 180 (D/40 \text{ pc})^{-0.9} \text{ cm}^{-3}$  (Scoville et al. 1987), where  $D$  is the size of the clump. Note that there are no available data of  $^{12}\text{CO}$  or  $\text{HI}$  with enough angular resolution to estimate the density of the clump. Using the photon index of Cir X-1 ( $\Gamma = 2.6$ ; Iaria et al. 2005) and the cross-sections for the photoionization (Balucinska-Church & McCammon 1992), a luminosity of  $\sim 2.2 \times 10^{39} \text{ erg s}^{-1}$  in the  $0.1\text{--}100 \text{ keV}$  band is required for Cir X-1 to generate the observed  $6.4 \text{ keV}$  line intensity. Since the luminosity exceeds the Eddington luminosity for a neutron star ( $\sim 2 \times 10^{38} \text{ erg s}^{-1}$ ) by an order of magnitude, photoionization is unlikely to be a significant origin of the  $6.4 \text{ keV}$  line.

A scenario where the iron in the cold and dense cloud is ionized by electrons with an energy of  $10\text{--}100 \text{ keV}$  might also be possible (e.g., Dogiel et al. 2011; Nobukawa et al. 2015). In this process, strong continuum emission must be generated by bremsstrahlung. The EW of the iron  $K\alpha$  line for the bremsstrahlung is  $\sim 400 \text{ eV}$  at most, assuming a solar abundance (Dogiel et al. 2011). Since the lower limit of the EW of the observed  $6.4 \text{ keV}$  line is  $1.2 \text{ keV}$ , an anomalous large iron abundance of 3 solar or more is required.

The  $6.4 \text{ keV}$  line can also be produced via ionization by protons with an energy of  $\sim 10 \text{ MeV}$ . In this process, the EW of the Fe I  $K\alpha$  emission is  $\sim 1 \text{ keV}$  or higher for

gas with a solar abundance (Dogiel et al. 2011). Thus the observed EW ( $>1.2$  keV) can be well explained with the proton origin. The Fe I K $\alpha$  intensity is calculated by

$$I_{6.4\text{keV}} = \frac{1}{4\pi} \int \sigma_{6.4\text{keV}} v n_{\text{H}} l Z_{\text{Fe}} \frac{dN}{dE} dE, \quad (1)$$

where  $\sigma_{6.4\text{keV}}$  is the proton's cross-section for the Fe I K $\alpha$  emission (Tatischeff et al. 2012),  $v$  is the velocity of the proton,  $n_{\text{H}}$  is the hydrogen number density of the clump,  $l$  is the thickness of the clump along the line of sight,  $Z_{\text{Fe}}$  is the iron abundance of the clump, and  $dN/dE$  is the spectral number distribution of the proton. Since the angular size of the largest 6.4 keV clump is  $\sim 8'$ , the thickness of the clump along the line of sight is assumed to be  $l = d \sin(8')$ . Here,  $d$  is the distance from the solar system to the clump. When the spectrum of the proton is set to be  $dN/dE \propto E^{-2.7}$ , assuming Galactic cosmic-rays (Cronin 1999), a proton energy density of  $\sim 300(100 \text{ cm}^{-3}/n_{\text{H}})(5 \text{ kpc}/d) \text{ eV cm}^{-3}$  in the 0.1–1000 MeV band is required to generate the observed 6.4 keV line intensity. Here, the abundance of the iron  $Z_{\text{Fe}}$  is assumed to be that of the Sun (Lodders 2003). This energy density is much higher than the canonical value for Galactic cosmic-rays ( $\sim 1 \text{ eV cm}^{-3}$ ; Neronov et al. 2012). Those protons are thought to be accelerated in G323.7–1.0.

The 6.4 keV clumps are located around or inside the faint radio shell (figure 2c). The shell would be the diffusive shock acceleration site of protons. Higher-energy protons easily escape from the acceleration site (the SNR shell region), since their mean free paths are longer than those of lower-energy ones (Ohira et al. 2011). Then the escaped high-energy protons would hit a high-density cloud located far from the shell and produce high-energy gamma-rays. In fact, the brightest peak of the gamma-ray source is about  $20'$  away from the 6.4 keV clumps (see figures 1 and 2c). The intensities of the 6.4 keV line and the high-energy gamma-rays depend on the density of low-energy protons and high-energy protons, respectively, as well as neutral gas density. More qualitative discussions on possible correlations between the 6.4 keV line and the gamma-ray intensities require detailed studies on the 6.4 keV line, gamma-rays, and  $^{12}\text{CO}$  or H I with an angular resolution better than a few arcmin. These would be future projects.

## Acknowledgments

SS is supported by Grant-in-Aid for Japan Society for the Promotion of Science (JSPS) Fellows number JP17J11471. This work is also supported by MEXT KAKENHI Grant Numbers JP15H02070 (HM), JP25887028 (HU), JP15H02090, JP17K14289 (MN), and

JSPS Number JP16J00548 (KKN). KKN is supported by Research Fellowships of JSPS for Young Scientists.

## References

- Araya, M. 2017, *ApJ*, 843, 12
- Arnaud, K. A. 1996, in *ASP Conf. Ser.*, 101, *Astronomical Data Analysis Software and Systems V*, ed. G. Jacoby & J. Barnes (San Francisco: ASP), 17
- Balucinska-Church, M., & McCammon, D. 1992, *ApJ*, 400, 699
- Bautz, M. W., et al. 2007, *Proc. SPIE*, 6686, 66860Q
- Beiersdorfer, P., et al. 1993, *ApJ*, 409, 846
- Cronin, J. W. 1999, *Rev. Modern Phys. Suppl.*, 71, S165
- Dogiel, V., Chernyshov, D., Koyama, K., Nobukawa, M., & Cheng, K.-S. 2011, *PASJ*, 63, 535
- Green, A. J., Reeves, S. N., & Murphy, T. 2014, *PASA*, 31, e042
- Iaria, R., Spanò, M., Di Salvo, T., Robba, N. R., Burderi, L., Fender, R., van der Klis, M., & Frontera, F. 2005, *ApJ*, 619, 503
- Ishisaki, Y., et al. 2007, *PASJ*, 59, S113
- Kaastra, J. S., & Mewe, R. 1993, *A&AS*, 97, 443
- Koyama, K., et al. 2007a, *PASJ*, 59, S23
- Koyama, K., et al. 2007b, *PASJ*, 59, S245
- Lodders, K. 2003, *ApJ*, 591, 1220
- McGlynn, T., Scollick, K., & White, N. 1998, in *IAU Symp.* 179, *New Horizons from Multi-Wavelength Sky Surveys*, ed. B. J. McLean et al. (Dordrecht: Kluwer Academic Publishers), 465
- Mendoza, C., Kallman, T. R., Bautista, M. A., & Palmeri, P. 2004, *A&A*, 414, 377
- Mitsuda, K., et al. 2007, *PASJ*, 59, S1
- Neronov, A., Semikoz, D. V., & Taylor, A. M. 2012, *Phys. Rev. Lett.*, 108, 051105
- Nobukawa, K. K., et al. 2015, *ApJ*, 807, L10
- Nobukawa, K. K., et al. 2018, *ApJ*, in press
- Ohira, Y., Murase, K., & Yamazaki, R. 2011, *MNRAS*, 410, 1577
- Palmeri, P., Mendoza, C., Kallman, T. R., Bautista, M. A., & Meléndez, M. 2003, *A&A*, 410, 359
- Puehlofer, G., et al. 2015, *Proc. 34th Int. Cosmic Ray Conf., PoS(ICRC2015)* (Trieste: SISSA), 886
- Sato, T., Koyama, K., Lee, S.-H., & Takahashi, T. 2016, *PASJ*, 68, S8
- Sato, T., Koyama, K., Takahashi, T., Odaka, H., & Nakashima, S. 2014, *PASJ*, 66, 124
- Scoville, N. Z., Yun, M. S., Sanders, D. B., Clemens, D. P., & Waller, W. H. 1987, *ApJS*, 63, 821
- Serlemitsos, P. J., et al. 2007, *PASJ*, 59, S9
- Tatischeff, V., Decourchelle, A., & Maurin, G. 2012, *A&A*, 546, A88
- Tawa, N., et al. 2008, *PASJ*, 60, S11
- Uchiyama, H., et al. 2009, *PASJ*, 61, S9
- Uchiyama, H., Nobukawa, M., Tsuru, T. G., & Koyama, K. 2013, *PASJ*, 65, 19
- Williams, B. J., et al. 2011, *ApJ*, 741, 96
- Yamaguchi, H., et al. 2014, *ApJ*, 785, L27
- Yamauchi, S., Nobukawa, K. K., Nobukawa, M., Uchiyama, H., & Koyama, K. 2016, *PASJ*, 68, 59
